# Supplementary material for: Neurotoxic reactive astrocytes are induced by activated microglia
Source: Springer Nature journal article supplement (doi:10.1038/nature21029), 2017-01-01
Supplement: 41586_2017_BFnature21029_MOESM320_ESM.pdf [file 41586_2017_BFnature21029_MOESM320_ESM.pdf]

Supplemental Figure 1: Raw blots used in main figures.

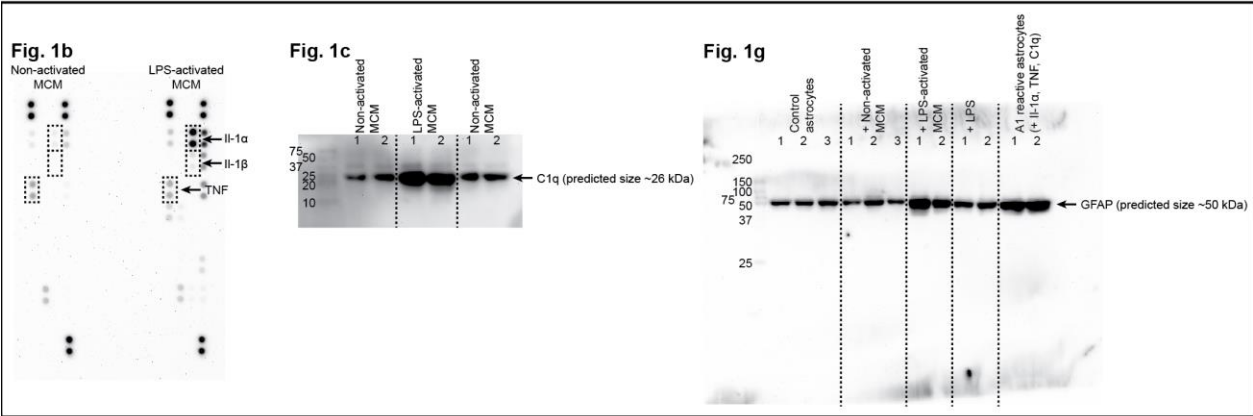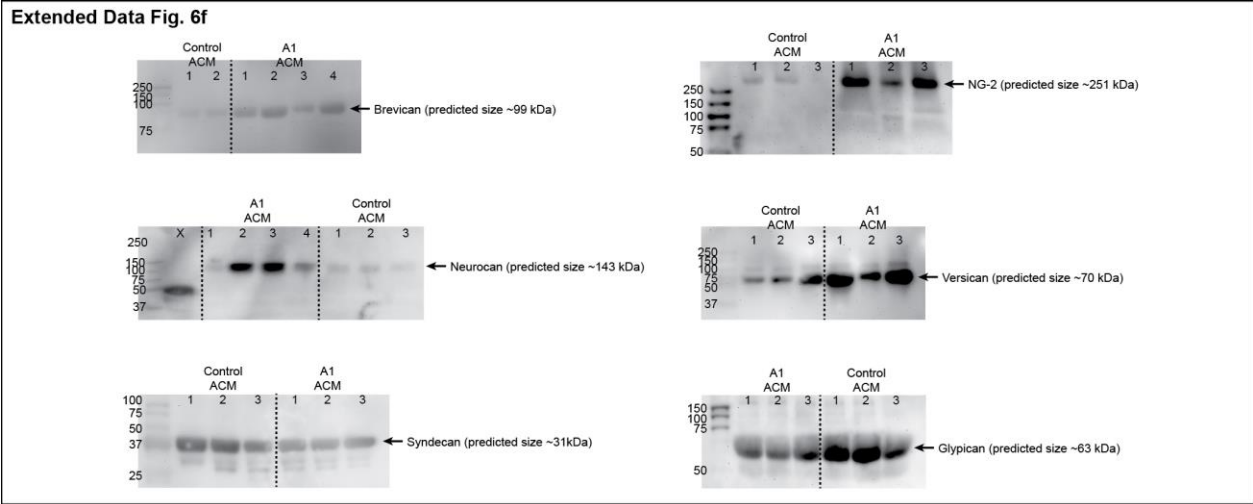

Supplemental Data Table 1: Rat primer sequences.

| ID               | FWD                      | REV                      | PRODUCT SIZE |
|------------------|--------------------------|--------------------------|--------------|
| <i>Aif1</i>      | AAGGATTTCAGGGAGGAAAAGC   | CTCCATGTA CTTCGTCTGAAGG  | 156          |
| <i>Aldh111</i>   | AGTGAAGGAGCTGTGTGACG     | TCCATCCGTTGGGTTGATGG     | 253          |
| <i>Amigo2</i>    | GTTCCGCCACAACAACATCAC    | GTTTCTGCAAGTGGGAGAGC     | 211          |
| <i>Aqp4</i>      | AACCCAGAAGACAGCACCT      | ACACTTACAGCTGTCCAGGGTTG  | 76           |
| <i>Aspg</i>      | CAGGTGCCCAGGTTCTATC      | GTCCACCTTGGTTGTCCGAT     | 152          |
| <i>Axl</i>       | GACACCCCCGAGGTACTTATG    | TGGGGGTTCACTCACTGGG      | 177          |
| <i>B3gnt5</i>    | TGCTCCTGGATGAAAGGTCC     | ACATGCTTGATCCGTGTGGT     | 161          |
| <i>Cd109</i>     | GTCGCTCACAGGTACCTCAA     | CTGTGAAGTTGAGCGTTGGC     | 116          |
| <i>Cd14</i>      | TCAGAATCTACCGACCATGAAGC  | GGACACTTTCTCGTCTCGG      | 119          |
| <i>Cd44</i>      | TCAGGATAGCCCCACAACAAC    | GACTCCGTACCAGGCATCTTC    | 159          |
| <i>Cd68</i>      | CGCATCTTGTACCTGACCCA     | TTCTGCGCTGAGAATGTCCA     | 254          |
| <i>Clcf1</i>     | GACTCGTGGGGGATGTTAGC     | CCCCAGGTAGTTTCAAGTAGGT   | 180          |
| <i>Cp</i>        | GATGTTTCCCAAACGCCTG      | GTAGCTCTGAGACGATGCTTGA   | 118          |
| <i>Cx3cr1</i>    | TTCTGCAGAAAGTCCCCGT      | CCGAACGTGAAGACAAGGGA     | 179          |
| <i>Cxcl10</i>    | TGCAAGTCTATCCTGTCCGC     | ACGGAGCTTTTTTGAACCTTC    | 140          |
| <i>Emp1</i>      | ACCATTGCCAACGTCTGGAT     | TGGAACACGAAGACCACGAG     | 188          |
| <i>Fbln5</i>     | AGGGGGTTAAGCGAAACCAG     | GTGAGTATCCTTTTAACTCTGGCA | 198          |
| <i>Fkbp5</i>     | TGCAGTGTCCGGCAGTTGTAT    | GGGTCCGCCAAAGTTAGAACA    | 112          |
| <i>Gabra1</i>    | TCCATGATGGCTCAAACCGT     | TCTTCATCAGGGGCTTGCC      | 183          |
| <i>Gapdh</i>     | GTGCCAGCCTCGTCTCATAG     | AGAGAAGGCAGCCCTGGTAA     | 91           |
| <i>Gas6</i>      | ACCTCGTCCAGAAGATTTAAC    | TCCGGGTGTAGTTGAGGCTA     | 189          |
| <i>Gbp2</i>      | TAAAGTCCCGAGGCCAAAC      | AACATATGTGGCTGGGCGAA     | 192          |
| <i>Gfap</i>      | AACCGCATCACCATCTCTGT     | TCCTTAATGACCTCGCCATCC    | 146          |
| <i>Ggta1</i>     | TCTCAGGATCTGGGAGTTGGA    | GAGTTCTATGGAGCTCCCCG     | 84           |
| <i>Gjc2</i>      | GGAAGGGCTCATCAGAAGGT     | CCGTTAGCACAAATGCGGAAG    | 179          |
| <i>Gpc4</i>      | TGGACCGACTGGTTACTGATG    | CCCTGGTTGGCTAATCCGTT     | 190          |
| <i>Gpc6</i>      | TTTCGACCCTACAACCCCGGA    | GTCTGTGACACTGTGCTGCAT    | 102          |
| <i>H2-D1</i>     | ATGGAACCTTCCAGAAGTGGG    | GAAGTAAGTTGGAGTCGGTGA    | 144          |
| <i>H2-T23</i>    | ATTGGAGCTGTTGTGAGGAGG    | CCACGAGGCAACTGTCTTTTC    | 130          |
| <i>Hsbp1</i>     | GAGATCACTGGCAAGCACGA     | ATTGTGTGACTGCTTTGGGG     | 172          |
| <i>ligp1</i>     | ATTTGGCTCGAAGCCTTTGC     | ACGGCATTGGCCACTTAA       | 169          |
| <i>Itgam</i>     | GACTCCGCATTTGCCCTACT     | TGCCCCAATGAGTGGTACAG     | 109          |
| <i>Lcn2</i>      | CCGACACTGACTACGACCAG     | AATGCATTGGTCCGGTGGGAA    | 197          |
| <i>Mbp</i>       | AGGCGTAGAGGAACTATGGGT    | TCACCACTGTCCAATCAGGG     | 125          |
| <i>Megf10</i>    | TACCGCCATGGGAGAAAAC      | TTATCAGCGCAGTGAGGGAC     | 98           |
| <i>Mertk</i>     | CTGCTTCTGCCGGTTTGTTC     | GGCTTTGCAAGGTAAGCTCG     | 179          |
| <i>Mog</i>       | AACTCCGTGCAGAAGTCGAG     | TCACTCAAAGGGGTTTCTTAGC   | 195          |
| <i>Nefl</i>      | AAGCACGAAGAGCGAGATGG     | ACCTGCCGAGCTCTGAGAGTA    | 177          |
| <i>Osmr</i>      | GTCATTCTGGACATGAAGAGGT   | AATCACAGCGTTGGGTCTGA     | 144          |
| <i>Psmb8</i>     | TATCTGCGGAATGGGGAACG     | AAAGTCCCCTCCCTTCTTG      | 136          |
| <i>Ptgs2</i>     | CTCAGCCATGCAGCAAATCC     | GGGTGGGCTTTCAGCAGTAAT    | 172          |
| <i>Ptx3</i>      | CATCCCGTTCAGGCTTTGGA     | CACAGGGAAGAAGCGAGGT      | 104          |
| <i>Rplp0</i>     | CCCCTGGCTGAAAAGGTCA      | TTGGTGTGAGGGGCTTAGTC     | 192          |
| <i>S100a10</i>   | GAAAGGGAGTTCCCTGGGTT     | CCCACCTTTCCATCTCGGCA     | 98           |
| <i>S1pr3</i>     | CTTGCAAGAACGAGAGCCTGT    | CCTCAACAGTCCACGAGAGG     | 70           |
| <i>Serpina3n</i> | GTCTTTCAAGGTGGTCCACAAGG  | GCCAATCACAGCATAGAAGCG    | 297          |
| <i>Serping1</i>  | TGGCTCAGAGGCTAACTGGC     | GAATCTGAGAAGGCTCTATCCCCA | 122          |
| <i>Slc10a6</i>   | TCCATAGAGACCGGAGCACA     | ATGCCTGATATGCTGCGACA     | 157          |
| <i>Snap25</i>    | GGATGAGCAAGGCGAACAAC     | TCCTGATTATTGCCCCAGGC     | 180          |
| <i>Sox10</i>     | GACCCTATTATGGCCACGCA     | GCCCTCTAAGGTCCGGGATA     | 182          |
| <i>Sparc</i>     | AAAACGTCTCGGTACCTTG      | TGGGACAGGTACCCATCAAT     | 232          |
| <i>Sparcl1</i>   | CAGTCCCAGAACGTTTCTCT     | CTGTGACTGTTTCTATGGGCT    | 186          |
| <i>Sphk1</i>     | AAAGCGAGACCCTGTTCCAG     | CAGTCTGCTGGTTGCATAGC     | 231          |
| <i>Srgn</i>      | GTTCAAGGTTATCCTGCTCGGA   | AAACAGGATCGGTCATCGGG     | 151          |
| <i>Steap4</i>    | CAAACGCCGAGTACCTTGCT     | CAGACAAACACCTGCCGACT     | 121          |
| <i>Syt1</i>      | AGCCATAGTTGCGGTCCTTT     | TCAGTCAGTCCGGTTTCAGC     | 189          |
| <i>Tgm1</i>      | AGACCAATTTTCTGCGGGC      | AGCGAGGACCTTCCATTGTG     | 100          |
| <i>Thbs1</i>     | TCGGGGCAGGAAGACTATGA     | ACTGGGCAGGGTTGTAATGG     | 118          |
| <i>Thbs2</i>     | CGTGAGCGATGAGAAGGACA     | CGATCTGTGCTTGGTTGTGC     | 122          |
| <i>Timp1</i>     | CGCTAGAGCAGATACCACGA     | CCAGGTCCGAGTTGCAGAAA     | 140          |
| <i>Tm4sf1</i>    | CTGAGGGACAGTACCTTCTGGATT | GGCTAGGCCTCAACACAGTTA    | 225          |
| <i>Ugt1a</i>     | GGAAGCTGTTAGTGATCCCC     | TGCTATGACCCCACTTCTGT     | 101          |
| <i>Vim</i>       | GAGGAGATGAGGGAGTTGCG     | CTGCAATTTTCTCGCAGCC      | 117          |

## Supplemental Data Table 2: Mouse primer sequences.

| ID               | FWD                      | REV                       | PRODUCT SIZE |
|------------------|--------------------------|---------------------------|--------------|
| <i>Aif1</i>      | GGATCAACAAGCAATTCCTCGA   | CTGAGAAAGTCAGAGTAGCTGA    | 247          |
| <i>Aldh111</i>   | GCAGGTACTTCTGGGTTGCT     | GGAAGGCACCCAAGGTCAA       | 86           |
| <i>Amigo2</i>    | GAGGCGACCATAATGTCGTT     | GCATCCAACAGTCCGATTCT      | 263          |
| <i>Aqp4</i>      | CTGGGCATCCTGTCAACAACA    | CAGGAATGTCCACACTTAGACAC   | 94           |
| <i>Arg1</i>      | TTTTAGGGTTACGGCCGGTG     | CCTCGAGGCTGTCCTTTTGA      | 146          |
| <i>Aspg</i>      | GCTGCTGGCCATTTACACTG     | GTGGCCCTGTGCATACTCTT      | 133          |
| <i>B3gnt5</i>    | CGTGGGGCAATGAGAACTAT     | CCCAGCTGAACTGAAGAAGG      | 207          |
| <i>C1q</i>       | TCTGCACTGTACCCGGCTA      | CCCTGGTAAATGTGACCCTTTT    | 232          |
| <i>Ccl2</i>      | CACTCACCTGCTGCTACTCA     | GCTTGGTGACAAAACTACAGC     | 117          |
| <i>Cd109</i>     | CACAGTCGGGAGCCCTAAAG     | GCAGCGATTTTCGATGTCCAC     | 147          |
| <i>Cd14</i>      | GGACTGATCTCAGCCCTCTG     | GCTTCAGCCCAGTGAAAGAC      | 232          |
| <i>Cd44</i>      | ACCTTGGCCACCACTCCTAA     | GCAGTAGGCTGAAGGGTTGT      | 299          |
| <i>Cd68</i>      | ACTGGTGTAGCCTAGCTGGT     | CCTTGGGCTATAAGCCGGTCC     | 85           |
| <i>Celf4</i>     | TGCGCTTTCCTCACCTACTG     | TTTCTATGTGAAGGGGGCTGG     | 111          |
| <i>Cclf1</i>     | CTTCAATCCTCCTCGACTGG     | TACGTCGGAGTTCAGCTGTG      | 176          |
| <i>Cp</i>        | TGTGATGGGAATGGCCAATGA    | AGTGTATAGAGGATGTTCCAGGTCA | 282          |
| <i>Cx3cr1</i>    | CAGCATCGACCCGGTACCTT     | GCTGCACTGTCCGGTTGTT       | 65           |
| <i>Cxcl10</i>    | CCCACGTGTTGAGATCATTG     | CACTGGGTAAAGGGGAGTGA      | 211          |
| <i>Emp1</i>      | GAGACACTGGCCAGAAAAGC     | TAAAAGGCAAGGGAATGCAC      | 183          |
| <i>Fbln5</i>     | CTTCAGATGCAAGCAACAA      | AGGCAGTGTGAGAGGCCCTTA     | 281          |
| <i>Fkbp5</i>     | TATGCTTATGGCTCGGCTGG     | CAGCCTTCCAGGTGGACTTT      | 194          |
| <i>Gabra1</i>    | GCTTCTAGCTTGCGTTCATT     | AACTTGCACTCTGGCCCTAA      | 293          |
| <i>Gapdh</i>     | AAGAGGGATGCTGCCCTTAC     | TACGGCCAAATCCGTTTACA      | 119          |
| <i>Gbp2</i>      | GGGGTCACTGTCTGACCACT     | GGGAAACCTGGGATGAGATT      | 285          |
| <i>Gfap</i>      | AGAAAGGTTGAATCGCTGGA     | CGGCGATAGTCGTTAGCTTC      | 299          |
| <i>Gfap</i>      | AGAAAGGTTGAATCGCTGGA     | CGGCGATAGTCGTTAGCTTC      | 299          |
| <i>Ggta1</i>     | GTGAACAGCATGAGGGGTTT     | GTTTTGTTGCCTCTGGGTGT      | 115          |
| <i>Gjc2</i>      | CTTGTGCATCTCCAGGTCCCA    | TGTCAGCACAATGCGGAAGA      | 151          |
| <i>H2-D1</i>     | TCCGAGATTGTAAGCGTGAAGA   | ACAGGGCAGTGCAGGGATAG      | 204          |
| <i>H2-T23</i>    | GGACCCGCAATGACATAGC      | GCACCTCAGGGTGACTTCAT      | 212          |
| <i>Hsbp1</i>     | GACATGAGCAGTCGGATTGA     | GGATGGGGTGTAGGGGTACT      | 265          |
| <i>ligp1</i>     | GGGGCAATAGCTCATTGGTA     | ACCTCGAAGACATCCCCTTT      | 104          |
| <i>Il1a</i>      | CGCTTAGTCCGGCAAAGAAAT    | CTTCCCCTTGCCTGACCTTG      | 271          |
| <i>Il1b</i>      | TGCCACCTTTTGACAGTGATG    | TGATGTGCTGCTGCGAGATT      | 138          |
| <i>Itgam</i>     | TGGCCTATACAAGCTTGGCTTT   | AAAGGCCGTTACTGAGGTGG      | 93           |
| <i>Lcn2</i>      | CCAGTTCCGCAATGGTATTTT    | CACACTCACCACCCATTTCAG     | 206          |
| <i>Marco</i>     | TTCTGTCGCATGCTCGGTTA     | CAGATGTTCCAGAGCCACC       | 71           |
| <i>Mbp</i>       | GAGACCCCTCACAGCGATCCAAG  | GGAGGTGGTGTTCGAGGTGTC     | 282          |
| <i>Mog</i>       | CACCCGAGACTGGCAGGACA     | CCACAGCAAAGAGGCCAATG      | 129          |
| <i>Msr1</i>      | CCAGCAATGACAAAAGAGATGACA | CTGAAGGGAGGGGCCATTTT      | 150          |
| <i>Nefl</i>      | CAAGGACGAGGTGTCGGAAA     | TGATTGTGCTCCTGCATGGCG     | 152          |
| <i>Osmr</i>      | GTGAAGGACCCAAAGCATGT     | GCCTAATACCTGGTGCCTGT      | 199          |
| <i>Psmb8</i>     | CAGTCCTGAAGAGGCCTACG     | CACCTTACCCCAACCGTCTT      | 121          |
| <i>Ptgs2</i>     | GCTGTACAAGCAGTGGCAAA     | CCCCAAAGATAGCATCTGGA      | 232          |
| <i>Ptx3</i>      | AACAAGCTCTGTTGCCATT      | TCCCAAATGGAACATTGGAT      | 147          |
| <i>S100a10</i>   | CCTCTGGCTGTGGACAAAAT     | CTGCTCACAGAAGCAGTGG       | 238          |
| <i>S1pr3</i>     | AAGCCTAGCCGGGAGAGAAAC    | TCAGGGAACAATTGGGAGAG      | 197          |
| <i>Saa3</i>      | GGGTCTAGAGACATGTGGCG     | TCTGGCATCGCTGATGACTT      | 150          |
| <i>Serpina3n</i> | CCTGGAGGATGTCCTTTCAA     | TTATCAGGAAAGGCCGATTG      | 233          |
| <i>Serping1</i>  | ACAGCCCTCTGAATTCCT       | GGATGCTCTCCAAGTTGCTC      | 299          |
| <i>Slc10a6</i>   | GCTTCGGTGGTATGATGCTT     | CCACAGGCTTTTCTGGTGAT      | 217          |
| <i>Snap25</i>    | AGCAAGGCGAACAACCTCGAT    | AGGCCACAGCATTTGCCTAA      | 106          |
| <i>Sphk1</i>     | GATGCATGAGGTGGTGAATG     | TGCTCGTACCCAGCATAGTG      | 135          |
| <i>Srgn</i>      | GCAAGGTTATCCTGCTCGGA     | TGGGAGGGCCGATGTTATTG      | 134          |
| <i>Steap4</i>    | CCCGAATCGTGTCTTTCCTA     | GGCCTGAGTAATGGTTGCAT      | 262          |
| <i>Syt1</i>      | CGCTCCAGTTTCCCTCTGAAT    | GGATGTTGGTTGTTTCGAGCG     | 126          |
| <i>Tgm1</i>      | CTGTTGGTCCCGTCCCAAA      | GGACCTTCCATTGTGCCTGG      | 97           |
| <i>Timp1</i>     | AGTGATTTCCCGCCAACTC      | GGGGCCATCATGGTATCTGC      | 123          |
| <i>Tm4sf1</i>    | GCCCAAGCATATTGTGGAGT     | AGGGTAGGATGTGGCACAAG      | 258          |
| <i>Tmem119</i>   | GTGTCTAACAGGCCCCAGAA     | AGCCACGTGGTATCAAGGAG      | 119          |
| <i>Tnfa</i>      | TGTGCTCAGAGCTTTCAACAA    | CTTGATGGTGGTGCATGAGA      | 88           |
| <i>Ugt1a</i>     | CCTATGGGTCACTTGCCACT     | AAAACCATGTTGGGCATGAT      | 136          |
| <i>Vim</i>       | AGACCAGAGATGGACAGGTGA    | TTGCGCTCCTGAAAACTGC       | 169          |

### Supplemental Data Table 3: Clinical and pathological characteristics of human post mortem tissue samples from multiple sclerosis patients and age-matched controls.

| Sex | Age (years) | PMD (hours) | Disease duration (years) | Disease course | FDX                               |
|-----|-------------|-------------|--------------------------|----------------|-----------------------------------|
| F   | 51          | 10          | 23                       | SP             | active                            |
| F   | 35          | 9           | 5                        | SP             | active                            |
| M   | 40          | 27          | 16                       | SP             | active                            |
| F   | 50          | 22          | 23                       | SP             | active, chronic inactive          |
| F   | 42          | 11          | 6                        | PP             | chronic active                    |
| F   | 34          | 12          | 11                       | SP             | chronic active                    |
| F   | 59          | 21          | 39                       | SP             | chronic active                    |
| F   | 59          | 21          | 39                       | SP             | chronic active                    |
| F   | 53          | 17          | 28                       | SP             | chronic inactive                  |
| M   | 53          | 13          | 16                       | SP             | chronic inactive                  |
| F   | 57          | 12          | 19                       | SP             | chronic inactive                  |
| M   | 82          | 21          | NA                       | NA             | control, unknown                  |
| M   | 35          | 22          | NA                       | NA             | control, carcinoma of the tongue  |
| M   | 84          | 5           | NA                       | NA             | control, carcinoma of the bladder |
| M   | 82          | 21          | NA                       | NA             | control, myelodysplastic syndrome |

Inflammatory staging of subcortical MS lesions was carried out according to established histological criteria: active - presence of MOG+/LFB+ phagocytes and strong microglia activation; early inactive - presence of PAS+ phagocytes and strong microglia activation; late inactive - no macrophages and diffuse microglia activation<sup>49-51</sup>. Abbreviations: F, female; FDX, functional diagnosis; LFB, Luxol fast blue; M, male; MOG, myelin oligodendrocyte glycoprotein; MS, multiple sclerosis; NA, not applicable; PAS, periodic acid Schiff; PMD, postmortem delay; PP, primary progressive MS; SP, secondary progressive MS.

### Supplemental Data Table 4: Clinical and pathological characteristics of human post mortem tissue samples from Alzheimer's disease patients and age-matched controls.

| Sex | Age (years) | PMD (hours) | FDX              | Brain region |
|-----|-------------|-------------|------------------|--------------|
| M   | 89          | 8.75        | AD               | PFC          |
| F   | 80          | 7           | AD               | PFC          |
| F   | 79          | 9.5         | AD               | PFC          |
| M   | 79          | -           | control, unknown | PFC          |
| M   | 80          | -           | control, unknown | PFC          |
| F   | 82          | -           | control, unknown | PFC          |
| M   | 81          | -           | control, unknown | PFC          |
| M   | 84          | -           | control, unknown | PFC          |
| F   | 90          | -           | control, unknown | PFC          |
| F   | 61          | 6           | AD               | Hippocampus  |
| F   | 85          | 14          | AD               | Hippocampus  |
| F   | 76          | 23          | AD               | Hippocampus  |
| F   | 56          | 12          | control, unknown | Hippocampus  |
| -   | -           | -           | control, unknown | Hippocampus  |
| -   | -           | -           | control, unknown | Hippocampus  |

Abbreviations: AD, Alzheimer's disease; F, female; FDX, functional diagnosis; M, male; PFC, prefrontal cortex; PMD, post mortem delay.

### Supplemental Data Table 5: Clinical and pathological characteristics of human post mortem tissue samples from Parkinson's disease patients and age-matched controls.

| Sex | Age (years) | Race | PMD (hours) | FDX                                                                 | CERAD | BRAAK | Brain region |
|-----|-------------|------|-------------|---------------------------------------------------------------------|-------|-------|--------------|
| M   | 76          | W    | 18          | PD                                                                  | 0     | 2     | SN           |
| M   | 86          | W    | 19          | Lewy body disease, incipient AD                                     | 0     | 2     | SN           |
| M   | 90          | W    | 7           | PD, neurofibrillary tangles and tau pathology BRAAK 4, TBI possible | 0     | 4     | SN           |
| M   | 92          | W    | 17          | PD, dementia                                                        | 0     | 3     | SN           |
| M   | 80          | W    | 9.5         | PD, dementia                                                        | 0     | 3     | SN           |
| F   | 85          | W    | 19          | PD, dementia, FTD, cerebrovascular disease                          | 0     | 4     | SN           |
| M   | 76          | W    | 13.5        | PD                                                                  | 0     | 1     | SN           |
| M   | 76          | W    | 25          | Control                                                             | NA    | NA    | SN           |
| M   | 82          | W    | 20          | Control                                                             | NA    | NA    | SN           |
| M   | 81          | W    | 26          | Control                                                             | NA    | NA    | SN           |
| M   | 76          | W    | 9           | Control                                                             | NA    | NA    | SN           |
| M   | 83          | W    | 25          | Control, vascular disease                                           | NA    | NA    | SN           |

Abbreviations: AD, Alzheimer's disease; BRAAK, Braak staging<sup>52</sup>; CERAD, Consortium to Establish a Registry for Alzheimer's Disease (CERAD) neurocognitive test battery result; F, female; FDX, functional diagnosis; FTD, Frontotemporal dementia; M, male; PMD, post mortem delay; SN, substantia nigra; NA, not applicable; TBI, traumatic brain injury; W, white (Caucasian).

### Supplemental Data Table 6: Clinical and pathological characteristics of human post mortem tissue samples from Huntington's disease patients and age-matched controls.

| Sex | Age (years) | PMD (hours) | FDX     | CAG Number | Vonsattel grade | Brain region    |
|-----|-------------|-------------|---------|------------|-----------------|-----------------|
| F   | 59          | 7           | HD      | 47         | HD4             | Caudate nucleus |
| M   | 54          | 8           | HD      | 46         | HD4             | Caudate nucleus |
| F   | 45          | 16          | HD      | Unknown    | HD4             | Caudate nucleus |
| M   | 51          | 16          | Control | Unknown    | N/A             | Caudate nucleus |
| M   | 54          | 6.5         | Control | Unknown    | N/A             | Caudate nucleus |
| F   | 63          | 16          | Control | 16         | N/A             | Caudate nucleus |
| M   | 60          | 17          | Control | 17         | N/A             | Caudate nucleus |
| M   | 41          | 16          | Control | 22         | N/A             | Caudate nucleus |

Abbreviations: HD, Huntington's disease; CAG Number, number of CAG repeats in the huntingtin gene; F, female; M, male; FDX, functional diagnosis; PMD, post mortem delay

### Supplemental Data Table 7: Clinical and pathological characteristics of human post mortem tissue samples from amyotrophic lateral sclerosis patients and age-matched controls.

| Sex | Age (years) | PMD (hours) | FDX     | Brain Atrophy | Dementia | Brain region |
|-----|-------------|-------------|---------|---------------|----------|--------------|
| F   | 67          | 19          | ALS     | None          | No       | Motor cortex |
| M   | 67          | 8           | ALS     | None          | No       | Motor cortex |
| M   | 56          | 4           | ALS     | Severe        | No       | Motor cortex |
| F   | 56          | 12          | Control | None          | No       | Motor cortex |
| -   | -           | -           | Control | None          | No       | Motor cortex |
| -   | -           | -           | Control | None          | No       | Motor cortex |

Abbreviations: ALS, Amyotrophic lateral sclerosis; F, female; FDX, functional diagnosis; M, male; PMD, post mortem delay.

### **References for Supplemental Data**

49. Lock, C. et al. Gene-microarray analysis of multiple sclerosis lesions yields new targets validated in autoimmune encephalomyelitis. *Nat. Med.* **8**, 500-508 (2002).
50. Frohman, E. M., Racke, M. K., Raine, C. S. Multiple sclerosis-the plaque and its pathogenesis. *N. Engl. J. Med.* **354**, 942-955 (2006).
51. Schirmer, L. et al. Differential loss of KIR4.1 immunoreactivity in multiple sclerosis lesions. *Ann. Neurol.* **75**, 810-828.
52. Braak, H. et al. Staging of brain pathology related to sporadic Parkinson's disease. *Neurobiol. Aging* **24**, 197-211 (2003).
